# Supplementary material for: Cupric coordination compounds with multiple anions: a promising strategy for the regulation of energetic materials
Source: Royal Society of Chemistry journal article supplement (doi:10.1039/d3ra01739g), 2023-01-01
Supplement: d3ra01739g1.pdf [file d3ra01739g1.pdf]

Supplementary Information

**Cupric coordination compounds with various anions: A  
promising strategy for regulation of energetic materials**

Liang-hong Xia,<sup>a</sup> Yan-na Wang,<sup>b</sup> Xiao-ming Yang,<sup>c</sup> Lin-na Liang,<sup>a</sup> Zhi-min Li,<sup>a\*</sup> Tong-lai  
Zhang<sup>a\*</sup>

<sup>a</sup> State Key Laboratory of Explosion Science and Technology, Beijing Institute of Technology, Beijing 100081, China

E-mail: lizm@bit.edu.cn (Z. Li), ztlbit@bit.edu.cn (T. Zhang)

<sup>b</sup> College of Chemistry and Chemical Engineering, Xingtai University, Xing tai 054001, China

<sup>c</sup> China Safety Technology Research Academy of Ordnance Industry, Beijing, 100053, China

## **Contents**

- 1. The FT-IR spectra of compounds 2-4**
- 2. The packing diagram of 4**
- 3. The TG-DTG curves of compounds 2-4**
- 4. X-ray crystallography**
- 5. The first exothermic decomposition peak temperature with four heating rates**
- 6. The percentage contribution of individual atomic contacts to the Hirshfeld surface**

# 1. The FT-IR spectra of compounds 2-4

**Fig. S1** FT-IR spectra of **2**

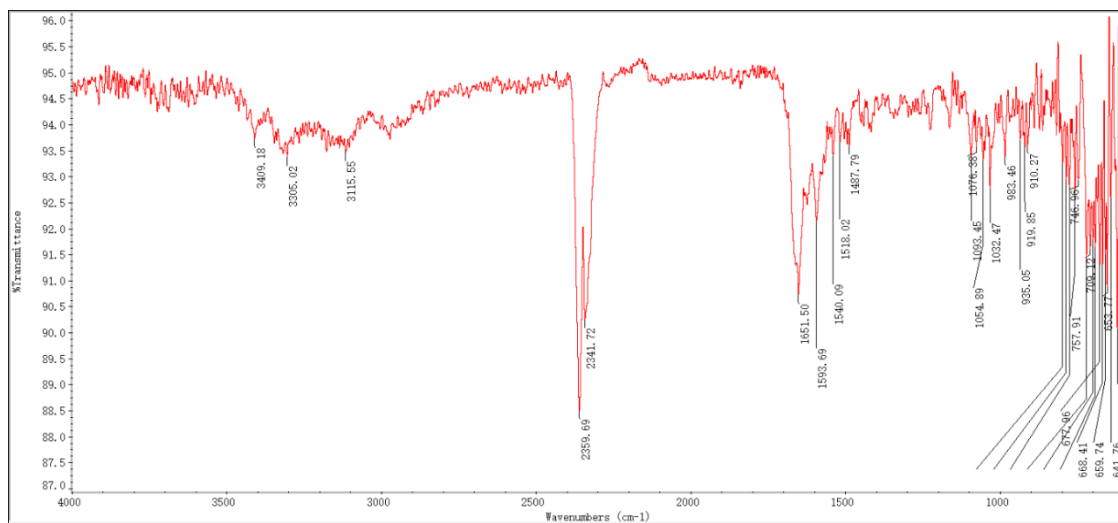

**Fig. S2** FT-IR spectra of **3**

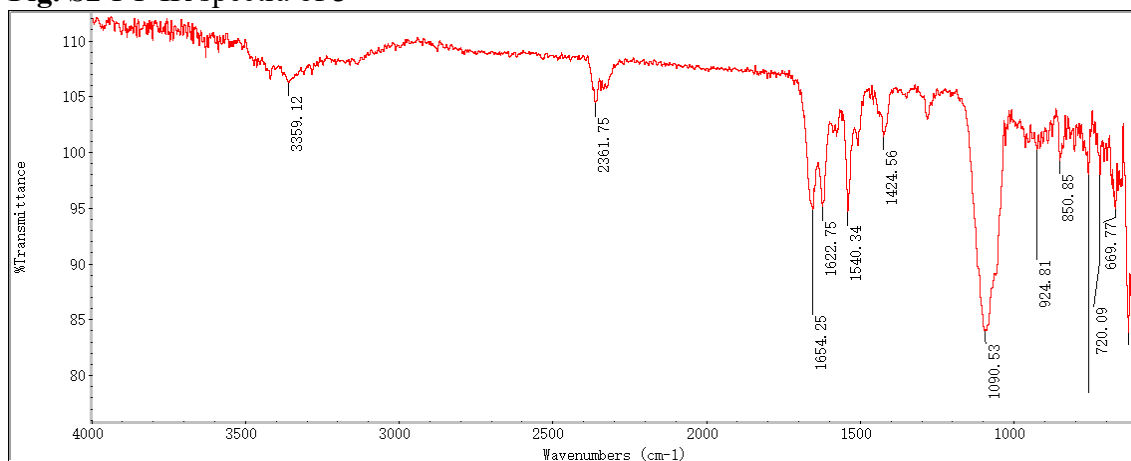

**Fig. S3** FT-IR spectra of **4**

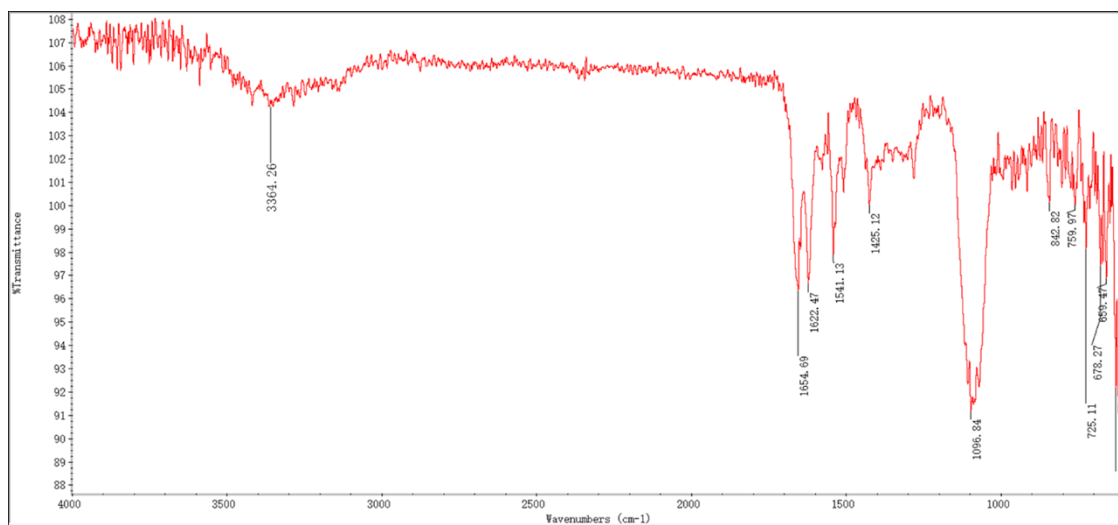

## 2. The packing diagram of 4

**Fig. S4.** (a) The packing diagram of **4** viewed along the a-axis; (b) The packing diagram of **4** viewed along the b-axis

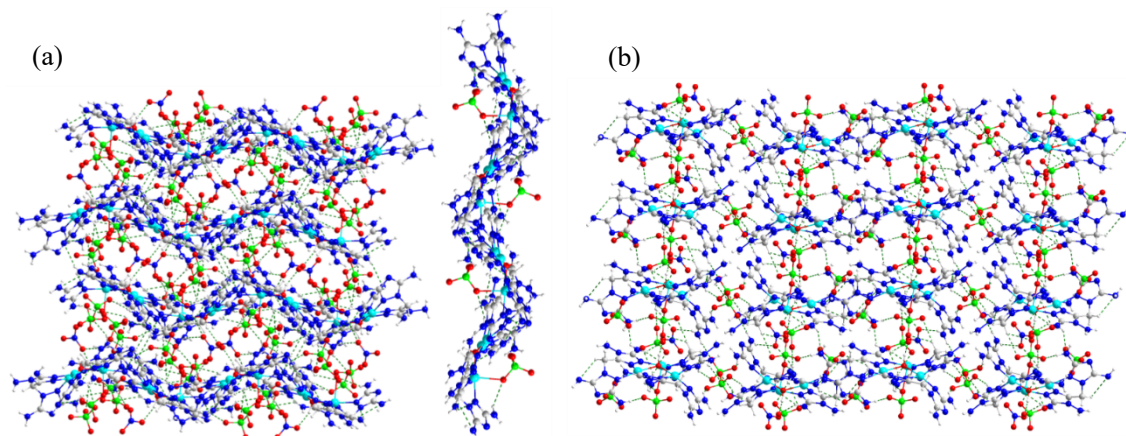

### 3. The TG-DTG curves of compounds 2-4

Fig. S5. TG-DTG curve of 2

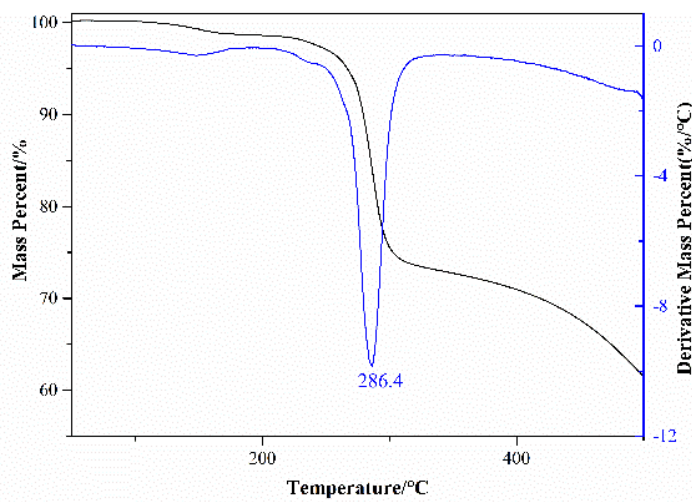

Fig. S6 TG-DTG curve of 3

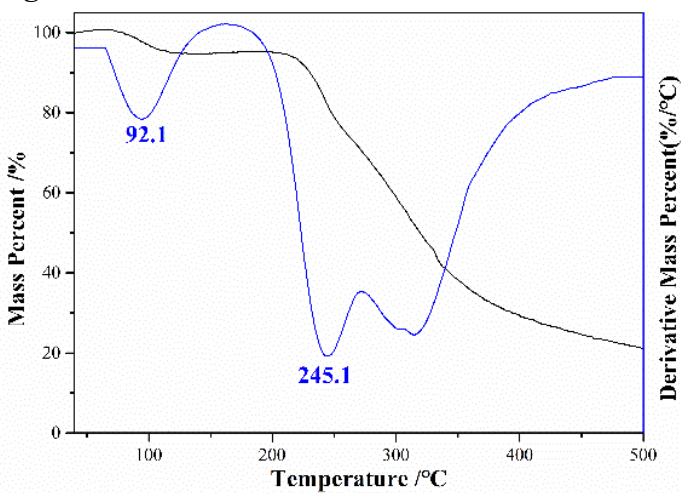

Fig. S7 TG-DTG curve of 4.

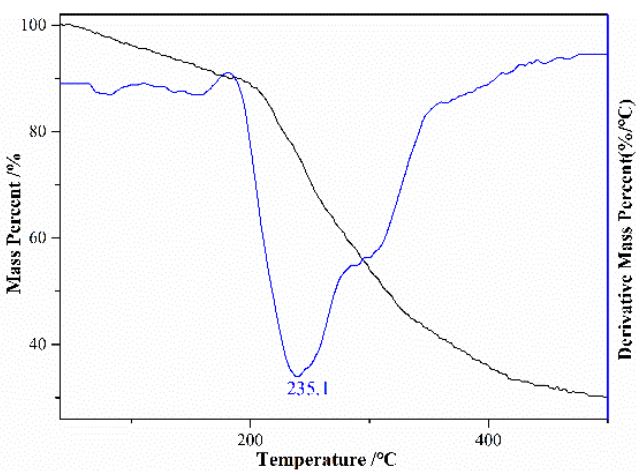

## 4. X-ray crystallography

**Table S1.** Bond Lengths for compound **2**

| Bond   | Length/Å | Bond   | Length/Å | Bond     | Length/Å |
|--------|----------|--------|----------|----------|----------|
| N1-C2  | 1.316(5) | N5-H5A | 0.89     | N9-H9A   | 0.86     |
| N1-N2  | 1.421(5) | N5-H5B | 0.89     | N9-H9B   | 0.86     |
| N2-C1  | 1.319(5) | N6-C5  | 1.342(5) | N10-C5   | 1.363(5) |
| N3-C2  | 1.375(5) | N6-N7  | 1.414(4) | N10-H10A | 0.86     |
| N3-C1  | 1.378(5) | N6-C3  | 1.469(5) | N10-H10B | 0.86     |
| N3-N5  | 1.417(4) | N7-C4  | 1.327(5) | C2-C3    | 1.495(5) |
| N4-C1  | 1.362(5) | N8-C5  | 1.349(5) | C3-H3A   | 0.97     |
| N4-H4A | 0.86     | N8-C4  | 1.377(5) | C3-H3B   | 0.97     |
| N4-H4B | 0.86     | N9-C4  | 1.369(5) |          |          |

**Table S2.** Bond Angles for compound **2**

| Bond       | Angle/°  | Bond          | Angle/°  | Bond       | Angle/°  |
|------------|----------|---------------|----------|------------|----------|
| C2-N1-N2   | 107.5(3) | C4-N7-N6      | 101.4(3) | N3-C2-C3   | 124.2(3) |
| C1-N2-N1   | 106.8(3) | C5-N8-C4      | 102.3(3) | N6-C3-C2   | 113.8(3) |
| C2-N3-C1   | 106.0(3) | C4-N9-H9A     | 120      | N6-C3-H3A  | 108.8    |
| C2-N3-N5   | 129.3(3) | C4-N9-H9B     | 120      | C2-C3-H3A  | 108.8    |
| C1-N3-N5   | 124.7(3) | H9A-N9-H9B    | 120      | N6-C3-H3B  | 108.8    |
| C1-N4-H4A  | 120      | C5-N10-H10A   | 120      | C2-C3-H3B  | 108.8    |
| C1-N4-H4B  | 120      | C5-N10-H10B   | 120      | H3A-C3-H3B | 107.7    |
| H4A-N4-H4B | 120      | H10A-N10-H10B | 120      | N7-C4-N9   | 123.3(4) |
| N3-N5-H5A  | 109.1    | N2-C1-N4      | 128.0(4) | N7-C4-N8   | 116.0(4) |
| N3-N5-H5B  | 108.9    | N2-C1-N3      | 109.9(4) | N9-C4-N8   | 120.5(4) |
| H5A-N5-H5B | 109.5    | N4-C1-N3      | 122.1(4) | N6-C5-N8   | 110.8(3) |
| C5-N6-N7   | 109.4(3) | N1-C2-N3      | 109.8(3) | N6-C5-N10  | 125.2(4) |
| C5-N6-C3   | 129.7(3) | N1-C2-C3      | 126.0(4) | N8-C5-N10  | 123.9(4) |
| N7-N6-C3   | 120.0(3) |               |          |            |          |

**Table S3.** Torsion Angles for compound **2**

| Bond        | Angle/°   | Bond        | Angle/°   | Bond         | Angle/°   |
|-------------|-----------|-------------|-----------|--------------|-----------|
| C2-N1-N2-C1 | -0.4(4)   | N2-N1-C2-C3 | 179.6(3)  | N6-N7-C4-N8  | -0.1(4)   |
| C5-N6-N7-C4 | 0.4(4)    | C1-N3-C2-N1 | -0.1(4)   | C5-N8-C4-N7  | -0.2(5)   |
| C3-N6-N7-C4 | 170.5(3)  | N5-N3-C2-N1 | -179.8(3) | C5-N8-C4-N9  | -175.3(4) |
| N1-N2-C1-N4 | -177.4(4) | C1-N3-C2-C3 | -179.4(3) | N7-N6-C5-N8  | -0.5(4)   |
| N1-N2-C1-N3 | 0.3(4)    | N5-N3-C2-C3 | 0.8(6)    | C3-N6-C5-N8  | -169.4(4) |
| C2-N3-C1-N2 | -0.1(4)   | C5-N6-C3-C2 | -111.6(4) | N7-N6-C5-N10 | 177.5(4)  |
| N5-N3-C1-N2 | 179.6(3)  | N7-N6-C3-C2 | 80.4(4)   | C3-N6-C5-N10 | 8.6(7)    |
| C2-N3-C1-N4 | 177.7(4)  | N1-C2-C3-N6 | 105.8(4)  | C4-N8-C5-N6  | 0.4(4)    |
| N5-N3-C1-N4 | -2.5(6)   | N3-C2-C3-N6 | -74.9(5)  | C4-N8-C5-N10 | -177.7(4) |
| N2-N1-C2-N3 | 0.3(4)    | N6-N7-C4-N9 | 174.8(4)  |              |           |

**Table S4.** Hydrogen Bonds for compound **2**

| D-H...A       | d(D-H)/Å | d(H...A)/Å | d(D...A)/Å | D-H...A/° |
|---------------|----------|------------|------------|-----------|
| N4-H4A...N7   | 0.86     | 2.267      | 154.71     | 3.067     |
| N4-H4B...N5   | 0.86     | 2.55       | 101        | 2.8396    |
| N5-H5A...N2   | 0.89     | 2.218      | 167.46     | 3.093     |
| N5-H5B...N9   | 0.89     | 2.57       | 153.55     | 3.39      |
| N9-H9A...N1   | 0.86     | 2.683      | 120.07     | 3.202     |
| N9-H9B...N8   | 0.86     | 2.385      | 148.3      | 3.149     |
| N10-H10A...N8 | 0.86     | 2.429      | 132.13     | 3.073     |
| N10-H10B...N1 | 0.86     | 2.3        | 163.69     | 3.135     |

-x, y+1/2, -z+1/2; -x-1/2, y-1/2, z; x-1/2, y, -z+1/2; -x+1/2, y-1/2, z; -x+1, -y+1, -z; x-1/2, -y+3/2, -z; x+1/2, -y+3/2, -z.

**Table S5.** Bond Lengths for compound **3**

| Bond    | Length/Å | Bond    | Length/Å | Bond    | Length/Å |
|---------|----------|---------|----------|---------|----------|
| C1-N4   | 1.343(6) | C15-N25 | 1.320(6) | N22-N23 | 1.411(5) |
| C1-N3   | 1.344(6) | C15-N22 | 1.345(6) | N27-N28 | 1.398(5) |
| C1-N1   | 1.355(6) | C15-N21 | 1.350(6) | N29-N30 | 1.393(4) |
| C2-N3   | 1.327(6) | C11-O3  | 1.424(4) | C12-O9B | 1.303(9) |
| C2-N5   | 1.332(6) | C11-O4  | 1.430(3) | C12-O9A | 1.350(6) |
| C2-N2   | 1.344(6) | C11-O1  | 1.434(3) | C12-O7B | 1.364(9) |
| C3-N5   | 1.445(5) | C11-O2  | 1.445(3) | C12-O8  | 1.382(6) |
| C3-C4   | 1.483(6) | Cu1-N6  | 1.950(3) | C12-O7A | 1.392(6) |
| C4-N6   | 1.298(5) | Cu1-N18 | 1.969(3) | C12-O6A | 1.423(6) |
| C4-N9   | 1.350(5) | Cu1-N4  | 1.993(4) | C12-O6B | 1.480(8) |
| C5-N8   | 1.321(6) | Cu1-O5  | 2.021(3) | C13-O12 | 1.418(4) |
| C5-N7   | 1.332(5) | Cu1-O1  | 2.361(3) | C13-O13 | 1.418(4) |
| C5-N9   | 1.365(5) | Cu2-N17 | 1.940(3) | C13-O11 | 1.440(4) |
| C6-N18  | 1.324(5) | Cu2-N30 | 1.960(3) | C13-O10 | 1.446(4) |
| C6-N19  | 1.324(5) | Cu2-N14 | 1.995(3) | C14-O16 | 1.411(4) |
| C6-N16  | 1.365(5) | Cu2-O5  | 2.013(3) | C14-O14 | 1.414(4) |
| C7-N17  | 1.297(5) | Cu2-O25 | 2.398(4) | C14-O15 | 1.420(4) |
| C7-N16  | 1.357(5) | Cu3-N29 | 1.960(3) | C14-O17 | 1.445(4) |
| C7-C8   | 1.487(6) | Cu3-N7  | 1.962(3) | C15-O20 | 1.397(4) |
| C8-N15  | 1.445(5) | Cu3-N22 | 2.018(3) | C15-O21 | 1.418(4) |
| C9-N13  | 1.329(6) | Cu3-O5  | 2.039(3) | C15-O18 | 1.421(5) |
| C9-N15  | 1.344(5) | Cu3-O2  | 2.395(3) | C15-O19 | 1.431(5) |
| C9-N12  | 1.351(5) | N4-N5   | 1.408(5) | C14-N21 | 1.333(6) |
| C10-N14 | 1.332(5) | N6-N7   | 1.397(5) | C14-N23 | 1.334(6) |
| C10-N13 | 1.350(5) | N9-N10  | 1.397(5) | C14-N24 | 1.351(6) |
| C10-N11 | 1.364(5) | N14-N15 | 1.402(5) | C12-C13 | 1.477(6) |
| C11-N26 | 1.322(5) | N16-N20 | 1.399(5) | C13-N23 | 1.443(6) |
| C11-N30 | 1.327(5) | N17-N18 | 1.400(5) | C12-N27 | 1.351(5) |
| C11-N27 | 1.364(5) | C12-N29 | 1.292(5) |         |          |

**Table S6.** Some bond Angles for for compound **3**

| Bond        | Angle/°    | Bond        | Angle/°    | Bond         | Angle/°    |
|-------------|------------|-------------|------------|--------------|------------|
| N6-Cu1-N18  | 164.35(15) | O5-Cu2-O25  | 95.49(13)  | N18-N17-Cu2  | 124.4(3)   |
| N6-Cu1-N4   | 88.47(14)  | N29-Cu3-N7  | 161.67(15) | C6-N18-Cu1   | 134.8(3)   |
| N18-Cu1-N4  | 98.09(15)  | N29-Cu3-N22 | 90.85(14)  | N17-N18-Cu1  | 117.5(2)   |
| N6-Cu1-O5   | 85.25(12)  | N7-Cu3-N22  | 97.77(14)  | C15-N22-Cu3  | 130.5(3)   |
| N18-Cu1-O5  | 88.55(13)  | N29-Cu3-O5  | 86.83(12)  | N23-N22-Cu3  | 117.7(2)   |
| N4-Cu1-O5   | 173.33(13) | N7-Cu3-O5   | 85.50(13)  | C12-N29-Cu3  | 125.1(3)   |
| N6-Cu1-O1   | 103.91(14) | N22-Cu3-O5  | 175.63(13) | N30-N29-Cu3  | 124.1(2)   |
| N18-Cu1-O1  | 90.55(14)  | N29-Cu3-O2  | 100.52(14) | C11-N30-Cu2  | 135.0(3)   |
| N4-Cu1-O1   | 88.13(13)  | N7-Cu3-O2   | 95.85(14)  | N29-N30-Cu2  | 117.8(2)   |
| O5-Cu1-O1   | 91.21(11)  | N22-Cu3-O2  | 88.62(13)  | C11-O1-Cu1   | 122.1(2)   |
| N17-Cu2-N30 | 173.24(14) | O5-Cu3-O2   | 88.16(11)  | C11-O2-Cu3   | 124.39(19) |
| N17-Cu2-N14 | 87.95(14)  | N5-N4-Cu1   | 121.5(3)   | Cu2-O5-Cu1   | 115.56(13) |
| N30-Cu2-N14 | 96.67(14)  | C4-N6-Cu1   | 123.7(3)   | Cu2-O5-Cu3   | 115.08(13) |
| N17-Cu2-O5  | 87.37(13)  | N7-N6-Cu1   | 123.6(2)   | Cu1-O5-Cu3   | 113.82(13) |
| N30-Cu2-O5  | 88.82(12)  | C5-N7-Cu3   | 134.5(3)   | Cu2-O5-H5    | 107.5      |
| N14-Cu2-O5  | 169.89(13) | N6-N7-Cu3   | 117.4(2)   | Cu1-O5-H5    | 105.5      |
| N17-Cu2-O25 | 88.56(14)  | C10-N14-Cu2 | 133.3(3)   | Cu3-O5-H5    | 96.9       |
| N30-Cu2-O25 | 86.25(14)  | N15-N14-Cu2 | 122.9(3)   | Cu2-O25-H25C | 108.8      |
| N14-Cu2-O25 | 93.34(15)  | C7-N17-Cu2  | 124.7(3)   | Cu2-O25-H25D | 109.4      |

**Table S7.** Torsion Angles for compound **3**

| Bond            | Angle/°   | Bond            | Angle/°   | Bond            | Angle/°   |
|-----------------|-----------|-----------------|-----------|-----------------|-----------|
| N5-C3-C4-N6     | -26.6(6)  | N8-C5-N9-N10    | -6.0(7)   | N25-C15-N21-C14 | -179.7(4) |
| N5-C3-C4-N9     | 152.2(4)  | N7-C5-N9-N10    | 175.7(4)  | N22-C15-N21-C14 | 0.3(5)    |
| N17-C7-C8-N15   | -33.4(6)  | N15-C9-N13-C10  | 2.0(5)    | N25-C15-N22-N23 | 179.7(4)  |
| N16-C7-C8-N15   | 151.5(4)  | N12-C9-N13-C10  | 179.1(4)  | N21-C15-N22-N23 | -0.3(5)   |
| N29-C12-C13-N23 | -33.9(6)  | N14-C10-N13-C9  | 0.3(5)    | N25-C15-N22-Cu3 | 36.9(6)   |
| N27-C12-C13-N23 | 148.2(4)  | N11-C10-N13-C9  | -177.7(4) | N21-C15-N22-Cu3 | -143.1(3) |
| N5-C2-N3-C1     | 0.7(5)    | N13-C10-N14-N15 | -2.4(5)   | N21-C14-N23-N22 | 0.0(5)    |
| N2-C2-N3-C1     | -178.9(5) | N11-C10-N14-N15 | 175.6(4)  | N24-C14-N23-N22 | 176.9(4)  |
| N4-C1-N3-C2     | 0.9(5)    | N13-C10-N14-Cu2 | -169.2(3) | N21-C14-N23-C13 | -167.7(4) |
| N1-C1-N3-C2     | 178.9(4)  | N11-C10-N14-Cu2 | 8.8(7)    | N24-C14-N23-C13 | 9.3(7)    |
| N3-C1-N4-N5     | -2.0(5)   | N13-C9-N15-N14  | -3.5(5)   | C15-N22-N23-C14 | 0.2(4)    |
| N1-C1-N4-N5     | -180.0(4) | N12-C9-N15-N14  | 179.2(4)  | Cu3-N22-N23-C14 | 148.9(3)  |
| N3-C1-N4-Cu1    | -153.6(3) | N13-C9-N15-C8   | 176.7(4)  | C15-N22-N23-C13 | 169.3(4)  |
| N1-C1-N4-Cu1    | 28.5(7)   | N12-C9-N15-C8   | -0.5(7)   | Cu3-N22-N23-C13 | -42.0(4)  |
| N3-C2-N5-N4     | -2.0(5)   | C10-N14-N15-C9  | 3.5(4)    | C12-C13-N23-C14 | -127.9(5) |
| N2-C2-N5-N4     | 177.6(4)  | Cu2-N14-N15-C9  | 172.1(3)  | C12-C13-N23-N22 | 65.6(5)   |
| N3-C2-N5-C3     | -178.5(4) | C10-N14-N15-C8  | -176.8(4) | N29-C12-N27-C11 | -0.6(4)   |
| N2-C2-N5-C3     | 1.2(8)    | Cu2-N14-N15-C8  | -8.2(5)   | C13-C12-N27-C11 | 177.6(4)  |
| C1-N4-N5-C2     | 2.3(4)    | C7-C8-N15-C9    | -136.9(4) | N29-C12-N27-N28 | 170.4(4)  |
| Cu1-N4-N5-C2    | 157.1(3)  | C7-C8-N15-N14   | 43.4(5)   | C13-C12-N27-N28 | -11.5(7)  |



|               |           |                 |           |                 |           |
|---------------|-----------|-----------------|-----------|-----------------|-----------|
| C1-N4-N5-C3   | 179.1(4)  | N17-C7-N16-C6   | 0.9(5)    | N26-C11-N27-C12 | -179.5(4) |
| Cu1-N4-N5-C3  | -26.1(5)  | C8-C7-N16-C6    | 176.6(4)  | N30-C11-N27-C12 | 1.4(4)    |
| C4-C3-N5-C2   | -130.8(5) | N17-C7-N16-N20  | 179.3(4)  | N26-C11-N27-N28 | 8.9(6)    |
| C4-C3-N5-N4   | 53.2(5)   | C8-C7-N16-N20   | -4.9(6)   | N30-C11-N27-N28 | -170.1(4) |
| N9-C4-N6-N7   | -1.0(5)   | N18-C6-N16-C7   | -0.2(5)   | N27-C12-N29-N30 | -0.5(4)   |
| C3-C4-N6-N7   | 177.9(4)  | N19-C6-N16-C7   | 176.0(4)  | C13-C12-N29-N30 | -178.7(4) |
| N9-C4-N6-Cu1  | 156.1(3)  | N18-C6-N16-N20  | -178.7(4) | N27-C12-N29-Cu3 | 162.2(3)  |
| C3-C4-N6-Cu1  | -24.9(6)  | N19-C6-N16-N20  | -2.5(7)   | C13-C12-N29-Cu3 | -16.0(6)  |
| N8-C5-N7-N6   | -179.4(4) | N16-C7-N17-N18  | -1.1(5)   | N26-C11-N30-N29 | 179.3(4)  |
| N9-C5-N7-N6   | -1.2(5)   | C8-C7-N17-N18   | -176.9(4) | N27-C11-N30-N29 | -1.7(4)   |
| N8-C5-N7-Cu3  | 15.7(7)   | N16-C7-N17-Cu2  | 162.4(3)  | N26-C11-N30-Cu2 | 10.0(7)   |
| N9-C5-N7-Cu3  | -166.1(3) | C8-C7-N17-Cu2   | -13.3(6)  | N27-C11-N30-Cu2 | -171.0(3) |
| C4-N6-N7-C5   | 1.4(5)    | N19-C6-N18-N17  | -176.4(4) | C12-N29-N30-C11 | 1.3(4)    |
| Cu1-N6-N7-C5  | -155.8(3) | N16-C6-N18-N17  | -0.5(4)   | Cu3-N29-N30-C11 | -161.5(3) |
| C4-N6-N7-Cu3  | 169.3(3)  | N19-C6-N18-Cu1  | 16.8(7)   | C12-N29-N30-Cu2 | 172.8(3)  |
| Cu1-N6-N7-Cu3 | 12.2(4)   | N16-C6-N18-Cu1  | -167.2(3) | Cu3-N29-N30-Cu2 | 10.0(4)   |
| N6-C4-N9-C5   | 0.3(5)    | C7-N17-N18-C6   | 1.0(4)    | O3-C11-O1-Cu1   | 67.7(3)   |
| C3-C4-N9-C5   | -178.7(4) | Cu2-N17-N18-C6  | -162.7(3) | O4-C11-O1-Cu1   | -170.7(2) |
| N6-C4-N9-N10  | -175.1(4) | C7-N17-N18-Cu1  | 170.5(3)  | O2-C11-O1-Cu1   | -51.2(3)  |
| C3-C4-N9-N10  | 5.9(7)    | Cu2-N17-N18-Cu1 | 6.8(4)    | O3-C11-O2-Cu3   | -46.7(3)  |
| N8-C5-N9-C4   | 178.9(4)  | N23-C14-N21-C15 | -0.2(5)   | O4-C11-O2-Cu3   | -168.5(2) |
| N7-C5-N9-C4   | 0.6(5)    | N24-C14-N21-C15 | -177.1(4) | O1-C11-O2-Cu3   | 72.3(3)   |

**Table S8.** Hydrogen Bonds for compound **3**

| D-H...A       | d(D-H)/Å | d(H...A)/Å | d(D...A)/Å | D-H...A/° |
|---------------|----------|------------|------------|-----------|
| N26-H1...N28  | 0.86     | 2.58       | 2.8643     | 101       |
| N26-H1...N12  | 0.86     | 2.37       | 3.2278     | 173       |
| N28-H2...O19  | 0.88     | 2.59       | 3.0751     | 116       |
| N28-H2...O21  | 0.88     | 2.35       | 3.1371     | 148       |
| N28-H3...O12  | 0.89     | 2.52       | 3.342      | 154       |
| N28-H3...O20  | 0.89     | 2.47       | 3.017      | 120       |
| O5-H4...O10   | 0.85     | 2.06       | 2.9008     | 172       |
| O25-H5...O11  | 0.85     | 2.06       | 2.8592     | 156       |
| O25-H6...O6A  | 0.85     | 2.02       | 2.8675     | 172       |
| N1-HF...O9A   | 0.86     | 2.53       | 3.2484     | 142       |
| O22-H7...O10  | 0.85     | 2.2        | 3.011      | 161       |
| O22-H8...O15  | 0.85     | 2.54       | 2.9408     | 110       |
| N2-HH...O17   | 0.86     | 2.22       | 3.0267     | 155       |
| O23-H9...O22  | 0.85     | 2.09       | 2.8678     | 152       |
| O23-H10...O12 | 0.85     | 2.58       | 3.3121     | 145       |
| N8-HJ...O14   | 0.86     | 2.46       | 3.1415     | 136       |
| N8-HJ...O16   | 0.86     | 2.48       | 3.0831     | 128       |
| O24-H11...O25 | 0.84     | 2.49       | 3.2761     | 155       |
| N8-HK...O23   | 0.86     | 1.99       | 2.8395     | 168       |

|              |      |      |        |     |
|--------------|------|------|--------|-----|
| N10-HL...O17 | 0.88 | 2.4  | 3.0676 | 133 |
| N10-HL...N24 | 0.88 | 2.6  | 3.177  | 124 |
| N10-HM...O22 | 0.89 | 2.44 | 3.1037 | 132 |
| N11-HN...N30 | 0.86 | 2.61 | 3.248  | 132 |
| N12HP...O19  | 0.86 | 2.53 | 3.3354 | 156 |
| N12-HQ...O24 | 0.86 | 2.37 | 3.1843 | 158 |
| N19-HR...O18 | 0.86 | 2.39 | 3.0413 | 133 |
| N19-HR...N4  | 0.86 | 2.51 | 3.2016 | 138 |
| N19-HS...N11 | 0.86 | 2.31 | 3.0574 | 146 |
| N20-HT...O7A | 0.89 | 2.55 | 3.3775 | 154 |
| N20-HU...N13 | 0.89 | 2.18 | 2.9924 | 153 |
| N24-HV...O16 | 0.86 | 2.21 | 2.9793 | 149 |
| N24-HW...O12 | 0.86 | 2.44 | 3.2639 | 162 |
| N25-HX...O15 | 0.86 | 2.24 | 2.9395 | 139 |
| N25-HY...N21 | 0.86 | 2.58 | 3.3721 | 153 |
| C3-H...O2    | 0.97 | 2.35 | 3.322  | 177 |
| C3-H...O4    | 0.97 | 2.55 | 3.1913 | 124 |
| C8-HC...O24  | 0.97 | 2.42 | 3.1537 | 132 |

**Table S9.** Bond Lengths for compound 4

| Bond   | Length/Å  | Bond    | Length/Å  | Bond    | Length/Å  |
|--------|-----------|---------|-----------|---------|-----------|
| C1-N4  | 1.326(10) | C13-C14 | 1.501(11) | N14-N15 | 1.412(9)  |
| C1-N3  | 1.326(11) | C14-N27 | 1.287(10) | N16-N20 | 1.398(10) |
| C1-N1  | 1.359(11) | C14-N26 | 1.353(10) | N17-N18 | 1.394(9)  |
| C2-N5  | 1.330(11) | C15-N28 | 1.316(10) | N24-N25 | 1.398(9)  |
| C2-N2  | 1.330(12) | C15-N29 | 1.322(10) | N26-N30 | 1.382(9)  |
| C2-N3  | 1.338(12) | C15-N26 | 1.374(10) | N27-N28 | 1.402(9)  |
| C3-N5  | 1.430(10) | C11-O2  | 1.395(6)  | N31-O19 | 1.228(10) |
| C3-C4  | 1.472(11) | C11-O3  | 1.406(7)  | N31-O20 | 1.234(10) |
| C4-N6  | 1.304(10) | C11-O1  | 1.418(7)  | N31-O18 | 1.280(11) |
| C4-N8  | 1.364(10) | C11-O4  | 1.433(7)  | Cl3-O11 | 1.403(7)  |
| C5-N10 | 1.317(11) | Cu1-N6  | 1.941(6)  | Cl3-O12 | 1.410(8)  |
| C5-N7  | 1.328(10) | Cu1-N28 | 1.973(7)  | Cl3-O10 | 1.434(8)  |
| C5-N8  | 1.359(11) | Cu1-O17 | 2.022(6)  | Cl3-O9  | 1.436(8)  |
| C6-N14 | 1.337(11) | Cu1-N4  | 2.026(7)  | Cl4-O14 | 1.300(11) |
| C6-N11 | 1.344(11) | Cu1-O1  | 2.341(7)  | Cl4-O15 | 1.341(11) |
| C6-N13 | 1.363(11) | Cu2-N27 | 1.932(6)  | Cl4-O13 | 1.371(13) |
| C7-N15 | 1.330(11) | Cu2-N18 | 1.959(7)  | Cl4-O16 | 1.408(9)  |
| C7-N13 | 1.335(11) | Cu2-N24 | 2.003(6)  | Cl2-O8  | 1.373(8)  |
| C7-N12 | 1.358(11) | Cu2-O17 | 2.006(5)  | Cl2-O7  | 1.409(9)  |
| C8-N15 | 1.432(11) | Cu3-N17 | 1.953(7)  | Cl2-O6  | 1.424(10) |
| C8-C9  | 1.476(11) | Cu3-N7  | 1.961(6)  | Cl2-O5  | 1.446(11) |
| C9-N17 | 1.311(10) | Cu3-N14 | 2.024(7)  | C11-N21 | 1.362(10) |
| C9-N16 | 1.339(10) | Cu3-O17 | 2.025(5)  | C12-N23 | 1.336(10) |

|         |           |         |           |         |           |
|---------|-----------|---------|-----------|---------|-----------|
| C10-N18 | 1.323(10) | N4-N5   | 1.405(9)  | C12-N25 | 1.342(10) |
| C10-N19 | 1.334(11) | N6-N7   | 1.396(9)  | C12-N22 | 1.355(10) |
| C10-N16 | 1.361(10) | N8-N9   | 1.388(9)  | C13-N25 | 1.452(10) |
| C11-N24 | 1.314(10) | C11-N23 | 1.346(10) |         |           |

**Table S10.** Bond Angles for for compound **4**

| Bond        | Angle/°  | Bond        | Angle/°  | Bond        | Angle/°  |
|-------------|----------|-------------|----------|-------------|----------|
| N6-Cu1-N28  | 165.2(3) | N17-Cu3-N7  | 165.8(3) | C10-N18-Cu2 | 136.7(6) |
| N6-Cu1-O17  | 85.4(2)  | N17-Cu3-N14 | 90.7(3)  | N17-N18-Cu2 | 116.9(5) |
| N28-Cu1-O17 | 89.0(2)  | N7-Cu3-N14  | 97.5(3)  | C11-N24-Cu2 | 133.7(5) |
| N6-Cu1-N4   | 88.0(3)  | N17-Cu3-O17 | 87.0(2)  | N25-N24-Cu2 | 122.3(5) |
| N28-Cu1-N4  | 98.2(3)  | N7-Cu3-O17  | 86.6(2)  | C14-N27-Cu2 | 126.2(6) |
| O17-Cu1-N4  | 172.5(2) | N14-Cu3-O17 | 171.1(3) | N28-N27-Cu2 | 124.4(5) |
| N6-Cu1-O1   | 104.0(3) | C1-N4-Cu1   | 131.3(6) | C15-N28-Cu1 | 135.3(5) |
| N28-Cu1-O1  | 89.8(3)  | N5-N4-Cu1   | 120.4(5) | N27-N28-Cu1 | 116.9(5) |
| O17-Cu1-O1  | 90.8(2)  | C4-N6-Cu1   | 123.5(5) | C11-O1-Cu1  | 125.9(5) |
| N4-Cu1-O1   | 87.3(3)  | N7-N6-Cu1   | 124.2(5) | Cu2-O17-Cu1 | 114.7(3) |
| N27-Cu2-N18 | 172.3(3) | C5-N7-Cu3   | 134.3(6) | Cu2-O17-Cu3 | 115.3(3) |
| N27-Cu2-N24 | 87.7(3)  | N6-N7-Cu3   | 116.9(4) | Cu1-O17-Cu3 | 113.8(2) |
| N18-Cu2-N24 | 96.8(3)  | C6-N14-Cu3  | 130.4(6) | Cu2-O17-H17 | 103.7    |
| N27-Cu2-O17 | 87.8(2)  | N15-N14-Cu3 | 117.6(5) | Cu1-O17-H17 | 103.7    |
| N18-Cu2-O17 | 88.8(2)  | C9-N17-Cu3  | 126.0(5) | Cu3-O17-H17 | 103.7    |
| N24-Cu2-O17 | 169.3(3) | N18-N17-Cu3 | 124.2(5) |             |          |

**Table S11.** Torsion Angles for compound **4**

| Bond            | Angle/°   | Bond           | Angle/°   | Bond            | Angle/°   |
|-----------------|-----------|----------------|-----------|-----------------|-----------|
| N5-C3-C4-N6     | -27.1(12) | C3-C4-N8-C5    | -178.1(8) | N25-C12-N23-C11 | 1.0(9)    |
| N5-C3-C4-N8     | 149.4(8)  | N6-C4-N8-N9    | -175.0(7) | N22-C12-N23-C11 | -179.6(8) |
| N15-C8-C9-N17   | -36.5(11) | C3-C4-N8-N9    | 7.9(13)   | N24-C11-N23-C12 | 0.8(9)    |
| N15-C8-C9-N16   | 146.1(8)  | N15-C7-N13-C6  | -0.1(9)   | N21-C11-N23-C12 | -176.7(7) |
| N25-C13-C14-N27 | -34.9(11) | N12-C7-N13-C6  | -176.8(8) | N23-C11-N24-N25 | -2.1(9)   |
| N25-C13-C14-N26 | 148.7(7)  | N14-C6-N13-C7  | -0.4(10)  | N21-C11-N24-N25 | 175.3(7)  |
| N4-C1-N3-C2     | 1.8(10)   | N11-C6-N13-C7  | -179.7(8) | N23-C11-N24-Cu2 | -169.4(6) |
| N1-C1-N3-C2     | 179.5(8)  | N11-C6-N14-N15 | 179.9(8)  | N21-C11-N24-Cu2 | 7.9(13)   |
| N5-C2-N3-C1     | -0.3(10)  | N13-C6-N14-N15 | 0.7(9)    | N23-C12-N25-N24 | -2.3(9)   |
| N2-C2-N3-C1     | -178.1(9) | N11-C6-N14-Cu3 | 37.6(13)  | N22-C12-N25-N24 | 178.3(7)  |
| N3-C1-N4-N5     | -2.4(10)  | N13-C6-N14-Cu3 | -141.6(6) | N23-C12-N25-C13 | 175.9(7)  |
| N1-C1-N4-N5     | 179.9(8)  | N13-C7-N15-N14 | 0.6(9)    | N22-C12-N25-C13 | -3.5(13)  |
| N3-C1-N4-Cu1    | -154.6(6) | N12-C7-N15-N14 | 177.3(7)  | C11-N24-N25-C12 | 2.5(8)    |
| N1-C1-N4-Cu1    | 27.7(13)  | N13-C7-N15-C8  | -169.6(8) | Cu2-N24-N25-C12 | 171.7(5)  |
| N2-C2-N5-N4     | 176.6(8)  | N12-C7-N15-C8  | 7.1(14)   | C11-N24-N25-C13 | -175.7(7) |
| N3-C2-N5-N4     | -1.1(10)  | C6-N14-N15-C7  | -0.7(8)   | Cu2-N24-N25-C13 | -6.5(10)  |
| N2-C2-N5-C3     | -4.8(15)  | Cu3-N14-N15-C7 | 147.6(6)  | C14-C13-N25-C12 | -135.0(8) |
| N3-C2-N5-C3     | 177.4(8)  | C6-N14-N15-C8  | 170.5(7)  | C14-C13-N25-N24 | 42.9(10)  |

|               |           |                 |           |                 |           |
|---------------|-----------|-----------------|-----------|-----------------|-----------|
| C1-N4-N5-C2   | 2.0(9)    | Cu3-N14-N15-C8  | -41.2(9)  | N27-C14-N26-C15 | 0.7(9)    |
| Cu1-N4-N5-C2  | 158.1(6)  | C9-C8-N15-C7    | -124.3(9) | C13-C14-N26-C15 | 177.5(7)  |
| C1-N4-N5-C3   | -176.6(7) | C9-C8-N15-N14   | 66.6(10)  | N27-C14-N26-N30 | 178.9(7)  |
| Cu1-N4-N5-C3  | -20.5(10) | N17-C9-N16-C10  | 0.5(9)    | C13-C14-N26-N30 | -4.3(12)  |
| C4-C3-N5-C2   | -128.0(9) | C8-C9-N16-C10   | 178.2(8)  | N28-C15-N26-C14 | 0.3(9)    |
| C4-C3-N5-N4   | 50.2(10)  | N17-C9-N16-N20  | 171.6(8)  | N29-C15-N26-C14 | 174.7(7)  |
| N8-C4-N6-N7   | -0.3(9)   | C8-C9-N16-N20   | -10.7(14) | N28-C15-N26-N30 | -177.9(7) |
| C3-C4-N6-N7   | 176.8(8)  | N18-C10-N16-C9  | -0.1(9)   | N29-C15-N26-N30 | -3.5(12)  |
| N8-C4-N6-Cu1  | 158.9(5)  | N19-C10-N16-C9  | -178.5(8) | N26-C14-N27-N28 | -1.4(9)   |
| C3-C4-N6-Cu1  | -24.1(12) | N18-C10-N16-N20 | -171.7(7) | C13-C14-N27-N28 | -178.2(7) |
| N10-C5-N7-N6  | 179.4(8)  | N19-C10-N16-N20 | 9.9(13)   | N26-C14-N27-Cu2 | 165.3(5)  |
| N8-C5-N7-N6   | -2.2(9)   | N16-C9-N17-N18  | -0.6(9)   | C13-C14-N27-Cu2 | -11.5(12) |
| N10-C5-N7-Cu3 | 17.0(14)  | C8-C9-N17-N18   | -178.5(7) | N29-C15-N28-N27 | -175.2(8) |
| N8-C5-N7-Cu3  | -164.7(6) | N16-C9-N17-Cu3  | 164.5(5)  | N26-C15-N28-N27 | -1.1(8)   |
| C4-N6-N7-C5   | 1.6(9)    | C8-C9-N17-Cu3   | -13.3(12) | N29-C15-N28-Cu1 | 17.9(13)  |
| Cu1-N6-N7-C5  | -157.4(6) | N19-C10-N18-N17 | 178.1(8)  | N26-C15-N28-Cu1 | -168.0(6) |
| C4-N6-N7-Cu3  | 167.6(6)  | N16-C10-N18-N17 | -0.2(9)   | C14-N27-N28-C15 | 1.5(8)    |
| Cu1-N6-N7-Cu3 | 8.6(8)    | N19-C10-N18-Cu2 | -0.6(15)  | Cu2-N27-N28-C15 | -165.5(5) |
| N10-C5-N8-C4  | -179.5(8) | N16-C10-N18-Cu2 | -178.9(6) | C14-N27-N28-Cu1 | 171.3(5)  |
| N7-C5-N8-C4   | 2.0(9)    | C9-N17-N18-C10  | 0.5(9)    | Cu2-N27-N28-Cu1 | 4.2(8)    |
| N10-C5-N8-N9  | -5.9(14)  | Cu3-N17-N18-C10 | -165.0(6) | O2-C11-O1-Cu1   | -170.6(5) |
| N7-C5-N8-N9   | 175.7(8)  | C9-N17-N18-Cu2  | 179.5(5)  | O3-C11-O1-Cu1   | 65.3(7)   |
| N6-C4-N8-C5   | -1.0(9)   | Cu3-N17-N18-Cu2 | 14.0(8)   | O4-C11-O1-Cu1   | -51.5(7)  |

**Table S12.** Hydrogen Bonds for compound 4

| D-H...A        | d(D-H)/Å | d(H...A)/Å | d(D...A)/Å | D-H...A/° |
|----------------|----------|------------|------------|-----------|
| N1-H1A...O1    | 0.86     | 2.54       | 2.915(11)  | 108       |
| N2-H2B...O9    | 0.86     | 2.19       | 2.997(11)  | 155       |
| N10-H10A...O11 | 0.86     | 2.52       | 3.200(10)  | 136       |
| N10-H10A...O12 | 0.86     | 2.36       | 3.017(11)  | 134       |
| N11-H11A...O10 | 0.86     | 2.21       | 2.909(11)  | 138       |
| N12-H12A...O20 | 0.86     | 2.35       | 3.165(11)  | 157       |
| N12-H12B...O12 | 0.86     | 2.2        | 2.947(12)  | 146       |
| O17-H17...O18  | 0.98     | 1.82       | 2.748(11)  | 157       |
| N19-H19A...O16 | 0.89     | 2.55       | 3.276(14)  | 139       |
| N20-H20A...O6  | 0.90(10) | 2.54(10)   | 3.110(13)  | 122(7)    |
| N20-H20A...O7  | 0.90(10) | 2.36(10)   | 3.091(13)  | 139(8)    |
| N20-H20B...O8  | 0.77(10) | 2.56(10)   | 3.029(12)  | 121(8)    |
| N20-H20B...O20 | 0.77(10) | 2.57(11)   | 3.220(12)  | 144(10)   |
| N21-H21A...O3  | 0.86     | 2.58       | 3.034(10)  | 114       |
| N22-H22A...N19 | 0.87     | 2.31       | 3.136(10)  | 158       |
| N29-H29A...N4  | 0.86     | 2.53       | 3.226(10)  | 139       |
| N29-H29A...O5  | 0.86     | 2.36       | 3.054(14)  | 138       |
| N29-H29B...N21 | 0.86     | 2.35       | 3.070(10)  | 142       |

|             |      |      |           |     |
|-------------|------|------|-----------|-----|
| C3-H3A...O2 | 0.97 | 2.49 | 3.142(11) | 124 |
| C3-H3A...O4 | 0.97 | 2.31 | 3.283(11) | 178 |
| C3-H3B...N2 | 0.97 | 2.62 | 2.978(12) | 102 |

## 5. The first exothermic decomposition peak temperature with four heating rates

**Table S13.** The first exothermic decomposition peak temperatures tested at different heating rates of compounds 2~4

| Compound | The first exothermic decomposition peak temperatures (°C) |                         |                         |                         |
|----------|-----------------------------------------------------------|-------------------------|-------------------------|-------------------------|
|          | 5 °C min <sup>-1</sup>                                    | 10 °C min <sup>-1</sup> | 15 °C min <sup>-1</sup> | 20 °C min <sup>-1</sup> |
| 2        | 301.4                                                     | 308.0                   | 312.6                   | 319.5                   |
| 3        | 245.6                                                     | 248.9                   | 254.1                   | 257.7                   |
| 4        | 211.6                                                     | 218.4                   | 224.9                   | 233.3                   |

## 6. The percentage contribution of individual atomic contacts to the Hirshfeld surface

**Table S14.** The percentage contribution of individual atomic contacts to the Hirshfeld surface in compounds 1-7

| Compound | the contribution of atomic contacts to the Hirshfeld surface /% |                 |                 |                 |                 |                 |                   |       |       |
|----------|-----------------------------------------------------------------|-----------------|-----------------|-----------------|-----------------|-----------------|-------------------|-------|-------|
|          | H...H                                                           | H...N<br>&N...H | H...O<br>&O...H | H...C<br>&C...H | C...O<br>&O...C | N...O<br>&O...N | Cu...O<br>&O...Cu | O...O | other |
| 1        | 20.8                                                            | 12              | 45.7            | 2.2             | 4.7             | 8.1             | 0.6               | 5.7   | 0.2   |
| 7        | 19.5                                                            | 9.7             | 41.5            | 0.6             | 5.9             | 12.5            | 0.6               | 4.6   | 5.1   |
